# Supplementary material
Source: PubMed Central journal article supplement (PMC2734938)
Supplement: NIHMS124473-supplement-Supp1.pdf [file NIHMS124473-supplement-Supp1.pdf]

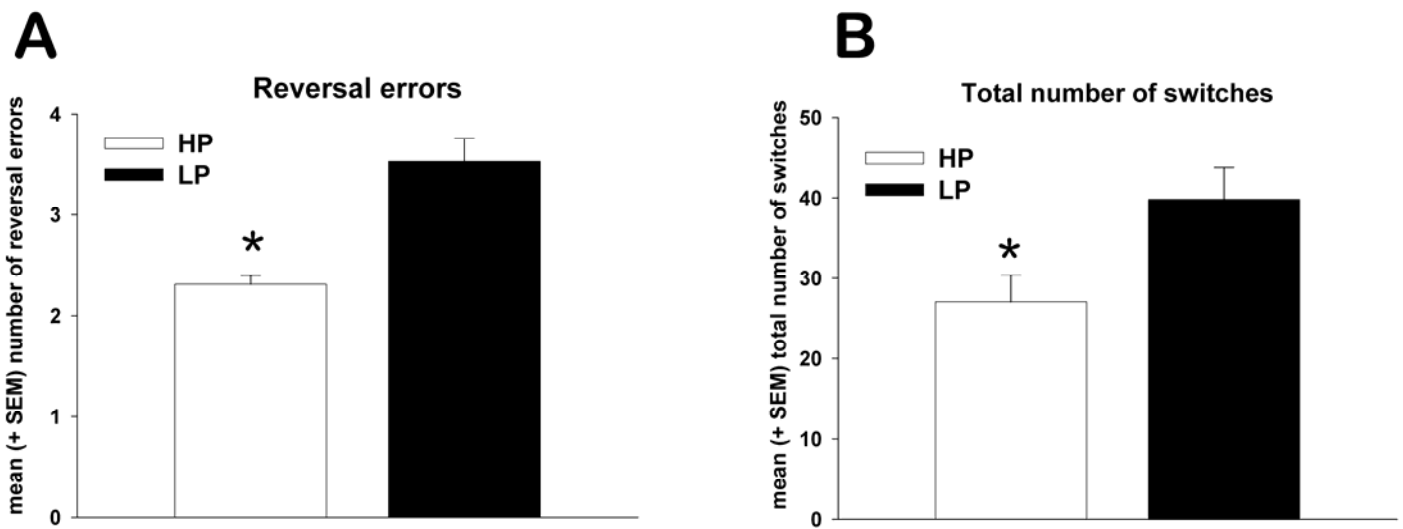

Fig. S1: Behavioral results for the high (HP) and low probability (LP) condition. A) Average number of reversal errors per reversal. B) Total number of switches between the two response alternatives during the experiment. \*  $p < 0.05$ .

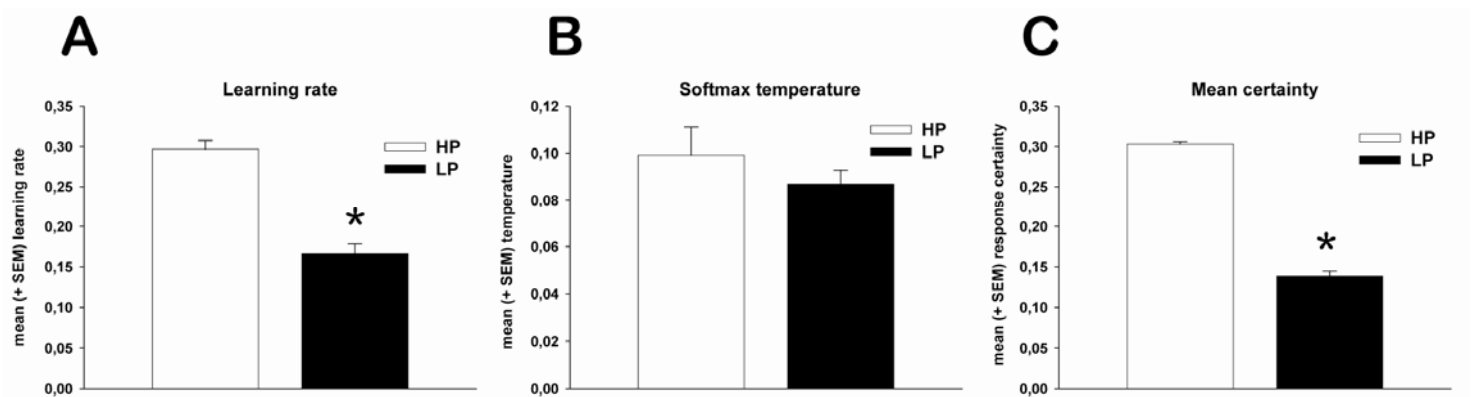

Fig. S2: Computational parameters for the two conditions. Both the learning rate (A) and the average decision certainty (C) were higher in the HP as compared to the LP condition. Inverse temperature (B) did not differ between conditions. \*  $p < 0.05$  high probability (HP) vs. low probability (LP) condition.

HP

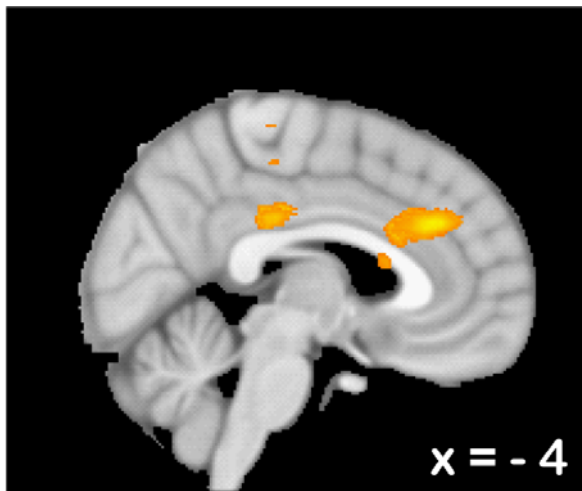

x = - 4

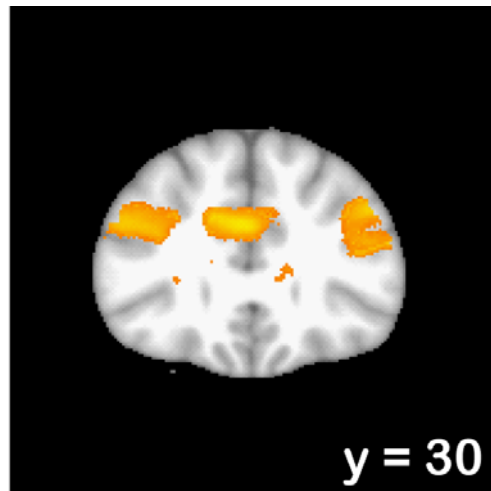

y = 30

LP

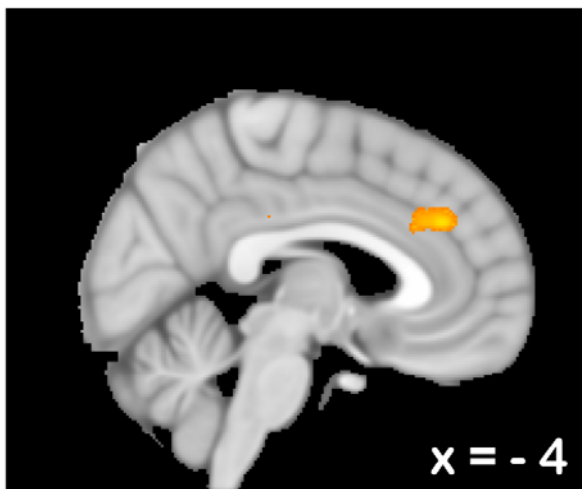

x = - 4

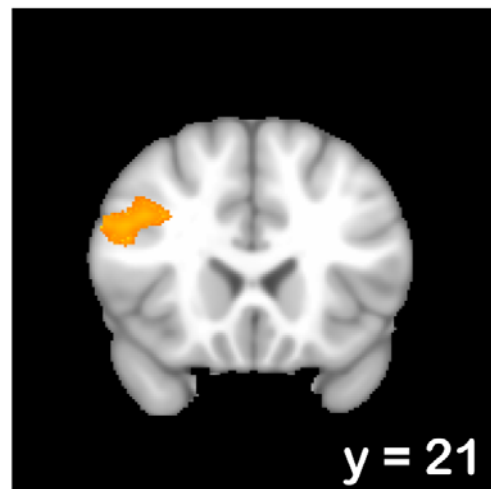

y = 21

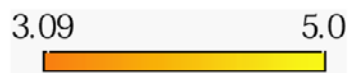

Fig. S3: Signal change in response to negative feedback (ALLNEG – ALLPOS) superimposed on the MNI template brain. In both conditions (HP: top row, LP: bottom row), there was increased activity in the RCZ (left) and in the lateral prefrontal cortex (right). The color bar indicates z-scores.

Tab. S1: Brain regions and MNI coordinates (x,y,z) of brain regions significantly activated in negative feedback trials that were followed by a behavioral adaptation after task rule reversal (FINREVERR – ALLPOS). Only clusters of at least 5 contiguous voxels are reported. L, left; R, right; BA, Brodmann area; RCZ, rostral cingulate zone.

| Brain region                           | z-score | mm3  | MNI coordinates |     |    |
|----------------------------------------|---------|------|-----------------|-----|----|
|                                        |         |      | x               | y   | z  |
| <b>HP condition</b>                    |         |      |                 |     |    |
| L/R RCZ                                | 4.79    | 7216 | 1               | 33  | 29 |
| L inferior parietal lobule             | 4.58    | 7533 | -52             | -37 | 35 |
| R inferior parietal lobule             | 4.6     | 8489 | 46              | -51 | 35 |
| R inferior/middle frontal gyrus        | 4.53    | 6346 | 34              | 18  | 28 |
| L inferior frontal gyrus               | 4.1     | 318  | -55             | 6   | 28 |
| L pregenual BA 32                      | 4.37    | 2080 | -12             | 50  | 6  |
| L middle frontal gyrus                 | 4.49    | 1515 | -41             | 42  | 27 |
| R dorsal postcentral sulcus            | 4.46    | 1142 | 24              | -40 | 59 |
| L parieto-occipital transition cortex  | 4.09    | 146  | -13             | -70 | 33 |
| L/R posterior cingulate cortex         | 4.1     | 1506 | 8               | -17 | 30 |
| paracentral lobule                     | 3.57    | 323  | -5              | -39 | 63 |
| <b>LP condition</b>                    |         |      |                 |     |    |
| L/R RCZ                                | 4.48    | 3277 | -2              | 36  | 28 |
| R middle frontal gyrus                 | 4.42    | 5057 | 46              | 38  | 26 |
| L inferior frontal sulcus              | 4.16    | 613  | -37             | 33  | 24 |
| L/R ventral posterior cingulate cortex | 4.38    | 770  | -1              | -24 | 27 |
| L inferior frontal gyrus               | 3.93    | 371  | -39             | 4   | 24 |
| R inferior parietal lobule             | 4.02    | 362  | 43              | -42 | 29 |

Tab. S2: Brain regions and MNI coordinates (x,y,z) of brain regions significantly activated in negative feedback trials after task rule reversal that were not followed by a behavioral adaptation (REVERR – ALLPOS). Only clusters of at least 5 contiguous voxels are reported. L, left; R, right; RCZ, rostral cingulate zone.

| Brain region                                       | z-score | mm3   | MNI coordinates |     |     |
|----------------------------------------------------|---------|-------|-----------------|-----|-----|
|                                                    |         |       | x               | y   | z   |
| <b>HP condition</b>                                |         |       |                 |     |     |
| R middle frontal gyrus/inferior frontal sulcus     | 5.07    | 13789 | 48              | 14  | 33  |
| L middle frontal gyrus                             | 5.16    | 4439  | -39             | 36  | 28  |
| R/L RCZ                                            | 5.36    | 8912  | 3               | 36  | 31  |
| R inferior parietal lobule                         | 5.07    | 12136 | 47              | -42 | 35  |
| L intraparietal sulcus/ L inferior parietal lobule | 4.6     | 7978  | -35             | -36 | 36  |
| R ventral parieto-occipital sulcus                 | 4.11    | 1282  | 14              | -57 | 18  |
| R/L posterior cingulate gyrus                      | 4.58    | 2121  | 1               | -24 | 33  |
| Pons                                               | 4.36    | 942   | 4               | -29 | -21 |
| L posterior superior insula                        | 4.12    | 892   | -32             | -24 | 14  |
| R postcentral gyrus                                | 4.1     | 968   | 24              | -35 | 71  |
| R lateral orbitofrontal cortex                     | 4.28    | 391   | 23              | 37  | -19 |
| L posterior inferior frontal sulcus I              | 3.91    | 488   | -34             | 9   | 27  |
| L posterior inferior frontal sulcus II             | 3.67    | 161   | -46             | 8   | 36  |
| L inferior frontal gyrus                           | 3.98    | 395   | -51             | 30  | 7   |
| R posterior insula                                 | 3.91    | 342   | 31              | -17 | 14  |
| R intraoccipital sulcus                            | 3.49    | 209   | 28              | -80 | 16  |
| Primary visual cortex                              | 3.61    | 195   | -11             | -69 | 12  |
| Cerebellum                                         | 4.06    | 147   | 9               | -76 | -19 |
| Paracentral lobule                                 | 3.81    | 143   | -4              | -23 | 62  |
| <b>LP condition</b>                                |         |       |                 |     |     |
| R inferior parietal lobule                         | 4.71    | 14389 | 46              | -36 | 35  |
| L intraparietal sulcus (horizontal branch) /       | 5       | 8398  | -39             | -40 | 42  |
| L inferior parietal lobule                         |         |       |                 |     |     |
| R middle frontal gyrus/inferior frontal sulcus     | 4.71    | 4559  | 44              | 9   | 36  |
| L middle frontal gyrus                             | 4.33    | 455   | -42             | 34  | 32  |
| R/L RCZ                                            | 4.55    | 3725  | 2               | 34  | 31  |
| R rostral middle frontal gyrus                     | 4.62    | 1950  | 21              | 52  | 32  |
| /superior frontal sulcus                           |         |       |                 |     |     |
| R posterior inferior temporal sulcus               | 4.24    | 1174  | 57              | -41 | -8  |
| L inferior temporal sulcus                         | 4.05    | 190   | -58             | -33 | -16 |
| R superior frontal sulcus                          | 3.65    | 345   | 30              | 17  | 50  |
| R dorsal postcentral gyrus                         | 3.71    | 168   | 31              | -29 | 52  |
| Cerebellum                                         | 4.07    | 144   | 4               | -50 | -15 |
